# Supplementary material for: Selective polymorph transformation via solvent-drop grinding
Source: Royal Society of Chemistry journal article supplement (doi:10.1039/b416980h), 2005-01-01
Supplement: b416980h.pdf [file b416980h.pdf]

Electronic Supplementary Information for "Selective polymorph transformation via solvent-drop grinding"

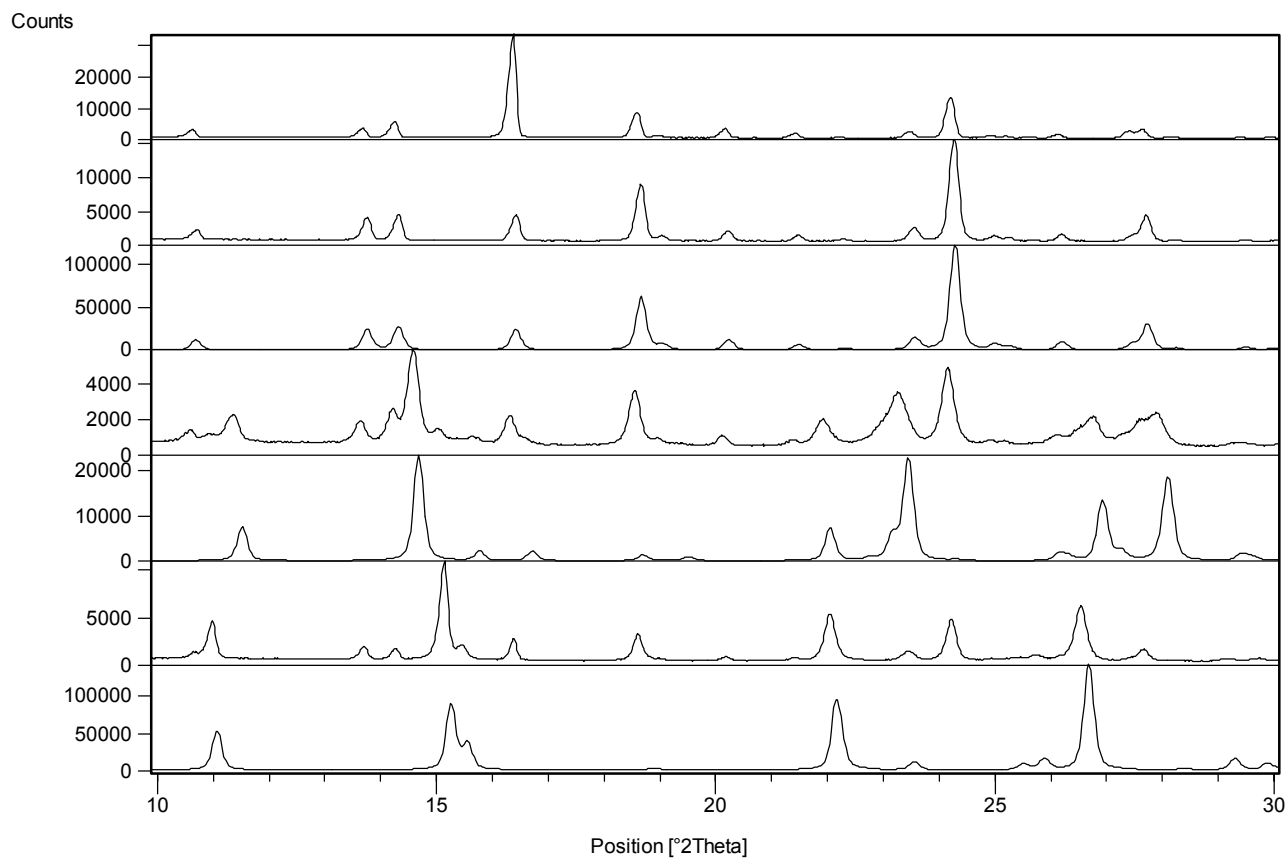

PXRD comparison of AA samples, from top to bottom: I starting material for grinding experiments; after solvent-drop grinding of I with acetonitrile; simulated I; after neat grinding of I; simulated III; after solvent-drop grinding of I with heptane; simulated II.

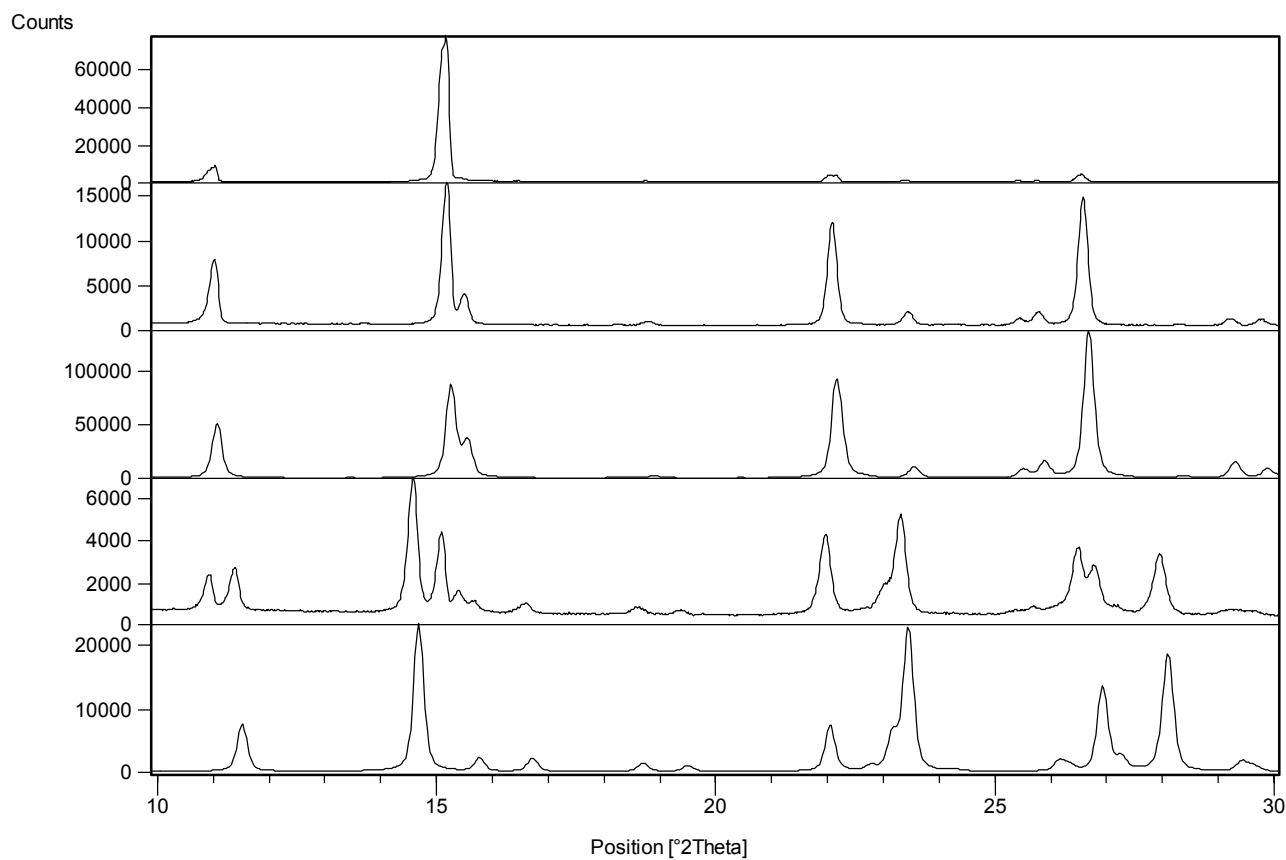

PXRD comparison of AA samples, from top to bottom: II starting material for grinding experiments; after neat grinding of II; simulated II; after solvent-drop grinding of II with chloroform; simulated III.
